# Supplementary material
Source: publisher site journal article supplement (https://www.dovepress.com/article/548440)
Supplement: Supplementary file 1 [file 548440%20Revised%20Supplementary%20Materials.docx]

**Supplementary Table 1: Comparison of hemoglobin A1c, medication adherence, and psychosocial outcomes at 6 months (T3) versus baseline (T1) in the intervention group**

|  | Intervention | | | | | | |
| --- | --- | --- | --- | --- | --- | --- | --- |
| Baseline  (T1) | 6 months (T3) | Expect | Mean difference (SE) | Changes (%) | Effect size | Sig*.* |
| Mean (SE) | Mean (SE) |
| *Primary outcome* | | | | | | | |
| Hemoglobin A1C | 8.3% (± 0.7) | 7.9% (± 0.4) | ↓ | -0.43 (± 0.6) | -5% | 0.24 | 0.53 |
| *Secondary outcome* | | | | | | | |
| Medication adherence | 40 (± 1.7) | 38.71 (±1.5) | ↑ | -1.29 (± 2.2) | -3% | 0.38 | 0.32 |
| *Psychosocial outcome* | | | | | | | |
| Concerns about medicines | 17.29 (± 2.1) | 17.14 (± 2.3) | ↓ | -0.14 (± 1.5) | -1% | 0.04 | 0.92 |
| Necessity of taking medicines | 14.14 (± 2.3) | 16.14 (± 1.6) | ↑ | 2 (± 2.6) | 14% | 0.19 | 0.61 |
| Negative beliefs about diabetes | 43.86 (± 4.3) | 35.14 (± 5.2) | ↓ | -8.71 (± 5) | -20% | 0.64a | 0.09 |
| Self-efficacy in taking medicines | 36.14 (± 1.8) | 35.14 (± 1.9) | ↑ | -1 (± 1.4) | -3% | 0.20 | 0.59 |
| Diabetes empowerment | 35.29 (± 1.3) | 34.43 (± 2.7) | ↑ | -0.86 (± 2.8) | -2% | 0.00 | 1.00 |
| Patient provider communication | 11.86 (± 1.0) | 10.80 (± 1.7) | ↑ | -0.6 (± 0.4) | -5% | 0.51b | 0.18 |
| Diabetes distress | 5.14 (± 1.4) | 2.71 (± 0.6) | ↓ | -2.43 (± 1.4) | -47% | 0.69c | 0.07 |

a-c Medium effect sizes based on Cohen’s d. 0.2 = small effect. 0.5 = medium effect. 0.8 = large effect.
